# Supplementary material
Source: publisher figshare collection journal article supplement (https://sage.figshare.com/ndownloader/files/11774999)
Supplement: Supplementary file 1 [file 11774999]

Supplemental Table: Descriptive Statistics

| Variable | Mean | Standard Deviation | Range |
| --- | --- | --- | --- |
| ***Outcome Variables*** |  |  |  |
| Violence in the Home (W3) | .07 | .25 | 0-1 |
| Child Exposure to Violence (W3) | .05 | .31 | 0-1 |
| Child Violent Victimization (W3) | .02 | .24 | 0-1 |
| ***Food Insecurity Variables*** |  |  |  |
| Household Food Insecurity (W1) | .13 | .36 | 0-1 |
| Household Food Insecurity (W2) | .09 | 1.00 | 0-1 |
| Household Food Insecurity (W3) | .12 | .33 | 0-1 |
| ***Persistence of Food Insecurity*** |  |  |  |
| None | .77 | .42 | 0-1 |
| Transient | .15 | .35 | 0-1 |
| Persistent | .05 | .23 | 0-1 |
| Very Persistent | .03 | .15 | 0-1 |
| ***Covariates*** |  |  |  |
| Socioeconomic Status | -.05 | .86 | -2.13-2.18 |
| Maternal Depression | 1.45 | .48 | 1-4 |
| Paternal Depression | 1.26 | .60 | 1-4 |
| Maternal Antisocial Behavior | .43 | .83 | 0-6 |
| Paternal Antisocial Behavior | .77 | 1.16 | 0-6 |
| Maternal Race (Nonwhite = 1) | .37 | .48 | 0-1 |
| Paternal Race (Nonwhite = 1) | .44 | .50 | 0-1 |
| Marital Status | .65 | .48 | 0-1 |
| Spousal Conflict | 1.81 | .52 | 1-4 |
